# Supplementary material for: A traditional Chinese Medicine Proves the Treatment of Endometrial Hyperplasia Via Regulating the HPO Axis in Rats
Source: Research Square preprint supplement (doi:10.21203/rs.3.rs-555936/v1), 2021-06-03
Supplement: Supplementary file 1 [file 50e8ca4abdd59dfb99bed3eb.docx]

**Table S2. List of primers used for qPCR**

|  | Sense Primer | Anti-sense Primer |
| --- | --- | --- |
| actin-β | CATCCTGCGTCTGGACCTGG | TAATGTCACGCACGATTTCC |
| MMP-1 | ACTCCCTTGGACTCACTCATT | GTGTTGTTGCACCTGTTGG |
| TIMP1 | ACCAGCGTTATGAGATCAAGATGA | TGCCCAGGGAACCAGGAA |
