# Supplementary material for: A traditional Chinese Medicine Proves the Treatment of Endometrial Hyperplasia Via Regulating the HPO Axis in Rats
Source: Research Square preprint supplement (doi:10.21203/rs.3.rs-555936/v1), 2021-06-03
Supplement: Supplementary file 2 [file 714b3110ebaf5a7c58de396c.docx]

**Table S1. Table of equivalently conversed human drug dose**

| Drug (g) | Dhuman (g/60kg/d) | Drat (g/kg/d) | 20×（g/kg/d） |
| --- | --- | --- | --- |
|
| *Saururus chinensis* | 22.5 | 0.375 | 7.5 |
| *Celosia cristata* | 15 | 0.25 | 5 |
| *Spatholobus suberectus* | 15 | 0.25 | 5 |
| Total weight | 52.5 | 0.875 | 17.5 |
